# Supplementary material
Source: MDPI journal article supplement (https://www.mdpi.com/2077-0472/13/1/83)
Supplement: s1 [file s1]

Archive with 2 entries (2 files):
- agriculture-2050035-supplementary-proof.pdf
- File S1_Questionnaire.pdf
