# Supplementary material
Source: MDPI journal article supplement (https://www.mdpi.com/2077-0472/13/1/83)
Supplement: s1 [file s1 › agriculture-2050035-supplementary-proof.pdf]

## Supplementary material

**File S1.** Questionnaire carried out on participating farms (in a separate document)

**Table S1.** Data Envelopment Analysis (DEA) matrix for the complete set of farms and eco-efficiency score

| DMU <sup>a</sup> | Output<br>(desirable)<br>Production<br>value<br>(EUR/year) | Output<br>(undesirable)<br>Climate change<br>(CC. kg CO <sup>2</sup> -eq/kg<br>live weight) | Input 1.<br>Surface in<br><i>montanera</i><br>(ha) | Input 2.<br>Number of<br>sows | Eco-<br>efficiency<br>score |
|------------------|------------------------------------------------------------|---------------------------------------------------------------------------------------------|----------------------------------------------------|-------------------------------|-----------------------------|
| 1                | 269,568.10                                                 | 3.900                                                                                       | 600                                                | 80                            | 0.939                       |
| 2                | 84,268.50                                                  | 2.975                                                                                       | 230                                                | 20                            | 1.000                       |
| 3                | 86,872.50                                                  | 3.607                                                                                       | 700                                                | 33                            | 0.839                       |
| 4                | 108,018.00                                                 | 3.121                                                                                       | 550                                                | 19                            | 0.967                       |
| 5                | 51,287.42                                                  | 6.073                                                                                       | 0                                                  | 15                            | 1.000                       |
| 6                | 30,577.77                                                  | 3.480                                                                                       | 200                                                | 12                            | 0.899                       |
| 7                | 56,029.05                                                  | 4.300                                                                                       | 200                                                | 12                            | 0.706                       |
| 8                | 62,689.00                                                  | 5.164                                                                                       | 300                                                | 19                            | 0.480                       |
| 9                | 229,056.00                                                 | 3.842                                                                                       | 1500                                               | 90                            | 0.859                       |
| 10               | 137,433.60                                                 | 3.559                                                                                       | 400                                                | 40                            | 0.880                       |
| 11               | 63,455.85                                                  | 5.524                                                                                       | 0                                                  | 22                            | 1.000                       |
| 12               | 148,886.40                                                 | 3.450                                                                                       | 235                                                | 50                            | 0.929                       |
| 13               | 99,916.65                                                  | 3.482                                                                                       | 200                                                | 0                             | 1.000                       |
| 14               | 64,810.80                                                  | 3.527                                                                                       | 500                                                | 12                            | 0.874                       |
| 15               | 86,414.40                                                  | 3.114                                                                                       | 398                                                | 10                            | 0.987                       |
| 16               | 335,702.61                                                 | 4.247                                                                                       | 750                                                | 83                            | 1.000                       |
| 17               | 109,971.00                                                 | 3.440                                                                                       | 600                                                | 30                            | 0.889                       |
| 18               | 634,500.09                                                 | 4.393                                                                                       | 2000                                               | 100                           | 1.000                       |
| 19               | 98,650.04                                                  | 4.155                                                                                       | 380                                                | 22                            | 0.722                       |
| 20               | 70,018.80                                                  | 3.619                                                                                       | 1000                                               | 30                            | 0.828                       |
| 21               | 91,458.30                                                  | 3.440                                                                                       | 600                                                | 30                            | 0.880                       |
| 22               | 162,027.00                                                 | 3.430                                                                                       | 1492                                               | 42                            | 0.917                       |
| 23               | 152,970.84                                                 | 3.232                                                                                       | 80                                                 | 22                            | 1.000                       |
| 24               | 85,896.00                                                  | 3.321                                                                                       | 550                                                | 25                            | 0.904                       |
| 25               | 118,819.80                                                 | 3.290                                                                                       | 480                                                | 0                             | 1.000                       |
| 26               | 13,502.25                                                  | 3.450                                                                                       | 18                                                 | 0                             | 1.000                       |
| 27               | 243,040.50                                                 | 3.244                                                                                       | 600                                                | 30                            | 1.000                       |
| 28               | 135,022.50                                                 | 3.524                                                                                       | 340                                                | 0                             | 1.000                       |
| 29               | 162,027.00                                                 | 3.681                                                                                       | 400                                                | 0                             | 1.000                       |
| 30               | 74,051.40                                                  | 2.878                                                                                       | 300                                                | 18                            | 1.000                       |
| 31               | 89,935.83                                                  | 3.673                                                                                       | 360                                                | 30                            | 0.825                       |
| 32               | 183,630.60                                                 | 3.581                                                                                       | 960                                                | 0                             | 1.000                       |
| 33               | 49,667.20                                                  | 3.353                                                                                       | 130                                                | 20                            | 0.949                       |
| 34               | 102,327.75                                                 | 3.156                                                                                       | 270                                                | 40                            | 0.960                       |
| 35               | 34,358.40                                                  | 3.426                                                                                       | 130                                                | 10                            | 0.942                       |

<sup>a</sup>DMU: Decision making unit.

**Table S2.** Input/output target and operational reduction percentages for inefficient farms

| DMU <sup>a</sup> | Input 1.<br>Surface in<br><i>montanera</i> | Input 2.<br>Number of sows | % of reduction<br>Surface in<br><i>montanera</i> | % of reduction<br>Number of<br>sows | Output<br>(desirable)<br>Production<br>value<br>(EUR/year) | Output<br>(undesirable)<br>Climate change<br>(CC. kg CO2-<br>eq) | % of reduction<br>Climate change<br>(CC. kg CO2-<br>eq) | % of increase<br>Production<br>value<br>(EUR/year) |
|------------------|--------------------------------------------|----------------------------|--------------------------------------------------|-------------------------------------|------------------------------------------------------------|------------------------------------------------------------------|---------------------------------------------------------|----------------------------------------------------|
| 1                | 600                                        | 51.37                      | -28.63                                           | 0                                   | 286,974.19                                                 | 3.70                                                             | -5.25                                                   | 6.46                                               |
| 3                | 352.34                                     | 20.09                      | -12.91                                           | -49.67                              | 103,534.53                                                 | 2.94                                                             | -18.44                                                  | 19.18                                              |
| 4                | 374.87                                     | 19                         | 0                                                | -31.84                              | 111,744.25                                                 | 2.98                                                             | -4.37                                                   | 3.45                                               |
| 6                | 200                                        | 12                         | 0                                                | 0                                   | 54,074.96                                                  | 3.08                                                             | -11.55                                                  | 76.84                                              |
| 7                | 200                                        | 12                         | 0                                                | 0                                   | 79,409.93                                                  | 3.14                                                             | -26.91                                                  | 41.73                                              |
| 8                | 300                                        | 19                         | 0                                                | 0                                   | 130,647.22                                                 | 3.09                                                             | -40.07                                                  | 108.41                                             |
| 9                | 684.12                                     | 34.21                      | -55.79                                           | -54.39                              | 266,562.82                                                 | 3.31                                                             | -13.77                                                  | 16.37                                              |
| 10               | 400                                        | 23.63                      | -16.37                                           | 0                                   | 156,184.07                                                 | 3.08                                                             | -13.48                                                  | 13.64                                              |
| 12               | 235                                        | 23.15                      | -26.85                                           | 0                                   | 160,187.49                                                 | 3.18                                                             | -7.97                                                   | 7.59                                               |
| 14               | 360                                        | 12                         | 0                                                | -28                                 | 88,974.20                                                  | 3.02                                                             | -14.51                                                  | 37.28                                              |
| 15               | 380                                        | 10                         | 0                                                | -4.52                               | 93,948.47                                                  | 3.06                                                             | -1.69                                                   | 8.72                                               |
| 17               | 388.18                                     | 21.53                      | -8.47                                            | -35.30                              | 123,722.20                                                 | 2.99                                                             | -13.21                                                  | 12.50                                              |
| 19               | 380                                        | 22                         | 0                                                | 0                                   | 136,547.16                                                 | 3.03                                                             | -26.98                                                  | 38.42                                              |
| 20               | 318.71                                     | 18.75                      | -11.25                                           | -68.13                              | 84,589.71                                                  | 2.90                                                             | -19.86                                                  | 20.81                                              |
| 21               | 353.11                                     | 20.12                      | -9.88                                            | -41.15                              | 103,967.06                                                 | 2.94                                                             | -14.45                                                  | 13.68                                              |
| 22               | 482.22                                     | 25.29                      | -16.71                                           | -67.68                              | 176,696.34                                                 | 3.10                                                             | -9.62                                                   | 9.05                                               |
| 24               | 337.20                                     | 19.49                      | -5.51                                            | -38.69                              | 95,006.66                                                  | 2.92                                                             | -11.98                                                  | 10.61                                              |
| 31               | 360                                        | 20.47                      | -9.53                                            | 0                                   | 108,957.85                                                 | 2.95                                                             | -19.58                                                  | 21.15                                              |
| 33               | 130                                        | 20                         | 0                                                | 0                                   | 120,264.83                                                 | 3.15                                                             | -5.97                                                   | 142.14                                             |
| 34               | 270                                        | 19.92                      | -20.08                                           | 0                                   | 106,597.38                                                 | 2.99                                                             | -5.18                                                   | 4.17                                               |
| 35               | 130                                        | 10                         | 0                                                | 0                                   | 48,678.76                                                  | 3.20                                                             | -6.52                                                   | 41.68                                              |

<sup>a</sup>DMU: Decision making unit.

**Table S3.** Benchmarks intensities of inefficient farms

| <b>Benchmark intensities</b>       |                               |                                  |                                  |                                  |                                  |                                  |                                  |                                  |                                  |
|------------------------------------|-------------------------------|----------------------------------|----------------------------------|----------------------------------|----------------------------------|----------------------------------|----------------------------------|----------------------------------|----------------------------------|
| <b>Inefficient DMU<sup>a</sup></b> | <b><math>\lambda_2</math></b> | <b><math>\lambda_{13}</math></b> | <b><math>\lambda_{16}</math></b> | <b><math>\lambda_{18}</math></b> | <b><math>\lambda_{23}</math></b> | <b><math>\lambda_{25}</math></b> | <b><math>\lambda_{26}</math></b> | <b><math>\lambda_{27}</math></b> | <b><math>\lambda_{30}</math></b> |
| 1                                  | 0                             | 0                                | 0.2442                           | 0.1856                           | 0.5702                           | 0                                | 0                                | 0                                | 0                                |
| 3                                  | 0                             | 0                                | 0                                | 0                                | 0                                | 0                                | 0                                | 0.1745                           | 0.8255                           |
| 4                                  | 0                             | 0                                | 0                                | 0                                | 0                                | 0.0792                           | 0                                | 0.2021                           | 0.7188                           |
| 6                                  | 0.0592                        | 0                                | 0                                | 0                                | 0                                | 0                                | 0.3399                           | 0                                | 0.6009                           |
| 7                                  | 0                             | 0.1879                           | 0                                | 0                                | 0.1422                           | 0                                | 0.1771                           | 0                                | 0.4929                           |
| 8                                  | 0                             | 0                                | 0                                | 0                                | 0.3122                           | 0.1189                           | 0                                | 0.1576                           | 0.4113                           |
| 9                                  | 0                             | 0                                | 0                                | 0.0601                           | 0                                | 0                                | 0                                | 0.9399                           | 0                                |
| 10                                 | 0                             | 0                                | 0                                | 0                                | 0.1272                           | 0                                | 0                                | 0.4266                           | 0.4462                           |
| 12                                 | 0                             | 0                                | 0                                | 0                                | 0.6051                           | 0                                | 0                                | 0.2271                           | 0.1677                           |
| 14                                 | 0                             | 0                                | 0                                | 0                                | 0                                | 0.3333                           | 0                                | 0                                | 0.6667                           |
| 15                                 | 0                             | 0                                | 0                                | 0                                | 0                                | 0.4444                           | 0                                | 0                                | 0.5556                           |
| 17                                 | 0                             | 0                                | 0                                | 0                                | 0                                | 0                                | 0                                | 0.2939                           | 0.7061                           |
| 19                                 | 0                             | 0                                | 0                                | 0                                | 0.0898                           | 0.0139                           | 0                                | 0.3242                           | 0.5721                           |
| 20                                 | 0                             | 0                                | 0                                | 0                                | 0                                | 0                                | 0                                | 0.0624                           | 0.9376                           |
| 21                                 | 0                             | 0                                | 0                                | 0                                | 0                                | 0                                | 0                                | 0.177                            | 0.823                            |
| 22                                 | 0                             | 0                                | 0                                | 0                                | 0                                | 0                                | 0                                | 0.6074                           | 0.3926                           |
| 24                                 | 0                             | 0                                | 0                                | 0                                | 0                                | 0                                | 0                                | 0.124                            | 0.876                            |
| 31                                 | 0                             | 0                                | 0                                | 0                                | 0.0055                           | 0                                | 0                                | 0.204                            | 0.7905                           |
| 33                                 | 0.3575                        | 0                                | 0                                | 0                                | 0.5841                           | 0                                | 0.0584                           | 0                                | 0                                |
| 34                                 | 0                             | 0                                | 0                                | 0                                | 0.2438                           | 0                                | 0                                | 0.0788                           | 0.6775                           |
| 35                                 | 0.4408                        | 0                                | 0                                | 0                                | 0                                | 0                                | 0.4934                           | 0                                | 0.0658                           |
| <b>Number of farms<sup>b</sup></b> | <b>3</b>                      | <b>1</b>                         | <b>1</b>                         | <b>2</b>                         | <b>9</b>                         | <b>5</b>                         | <b>4</b>                         | <b>14</b>                        | <b>18</b>                        |

<sup>a</sup>DMU: Decision making unit.<sup>b</sup>Number of farms: Total number of farms for which they are a reference.
